# Supplementary material
Source: ML conference proceedings conference paper supplement (https://proceedings.neurips.cc/paper_files/paper/2018/hash/6651526b6fb8f29a00507de6a49ce30f-Abstract.html)
Supplement: Supplementary file [file 6651526b6fb8f29a00507de6a49ce30f-Supplemental.zip]

## A Proof of Theorem 1

Without loss of generality, assume  $x^* = 0$ . Then the linearized SGD is given by

$$x_{t+1} = x_t - \frac{\eta}{B} \sum_{j=1}^B H_{\xi_j} x_t.$$

Hence, we have

$$\mathbb{E}x_{t+1} = \mathbb{E}(I - \eta H)x_t,$$

and

$$\begin{aligned} \mathbb{E}\|x_{t+1}\|^2 &= \mathbb{E}x_t^T \left[ I - \frac{2\eta}{B} \sum_{j=1}^B H_{\xi_j} + \frac{\eta^2}{B^2} \left( \sum_{j=1}^B H_{\xi_j} \right)^2 \right] x_t \\ &= \mathbb{E}x_t^T \mathbb{E} \left[ I - \frac{2\eta}{B} \sum_{j=1}^B H_{\xi_j} + \frac{\eta^2}{B^2} \left( \sum_{j=1}^B H_{\xi_j} \right)^2 \right] x_t \\ &= \mathbb{E}x_t^T \left[ I - 2\eta H + \frac{\eta^2}{B^2} \left( \frac{B(n-B)}{n(n-1)} \sum_{i=1}^n H_i^2 + \frac{nB(B-1)}{n-1} H^2 \right) \right] x_t \\ &= \mathbb{E}x_t^T \left[ (I - \eta H)^2 + \frac{\eta^2(n-B)}{B(n-1)} \Sigma \right] x_t. \end{aligned}$$

Therefore, if we have

$$\lambda_{\max} \left[ (I - \eta H)^2 + \frac{\eta^2(n-B)}{B(n-1)} \Sigma \right] \leq 1,$$

we have as  $t \rightarrow +\infty$ ,

$$\mathbb{E}\|x_t\|^2 \leq \lambda_{\max}^t \left[ (I - \eta H)^2 + \frac{\eta^2(n-B)}{B(n-1)} \Sigma \right] \mathbb{E}[\|x_0\|^2] \leq \mathbb{E}[\|x_0\|^2],$$

therefore  $x^*$  is linear stable.

If  $d = 1$ , then  $H$  and  $\Sigma$  are scalars, and we have

$$\begin{aligned} \mathbb{E}x_{t+1}^2 &= \left[ (1 - \eta H)^2 + \frac{\eta^2(n-B)}{B(n-1)} \Sigma \right] \mathbb{E}x_t^2 \\ &= \left[ (1 - \eta H)^2 + \frac{\eta^2(n-B)}{B(n-1)} \Sigma \right]^{t+1} \mathbb{E}[x_0^2] \end{aligned}$$

In this case, if

$$\left[ (1 - \eta H)^2 + \frac{\eta^2(n-B)}{B(n-1)} \Sigma \right] > 1,$$

then  $\mathbb{E}x_t^2 \rightarrow \infty$ , and  $x^* = 0$  is not stable.

## B A Synthetic Example

In this section, we provide an example for which SGD selects solutions that generalize worse than GD.

In this example, the ground truth is  $f^*(x) = 0$ . We are given two data points  $\{(0, 0), (1, 0)\}$  and we attempt to fit them using a second order polynomial parameterized by  $f(x) := a_0 + \sqrt{a_1}x - \sqrt{a_2}x^2$ . Thus the empirical risk is given by

$$J(a_0, a_1, a_2) := \frac{1}{2} (a_0^2 + (a_0 + \sqrt{a_1} - \sqrt{a_2})^2), \quad (10)$$

with  $a_1 \geq 0, a_2 \geq 0$ . Here the global minima forms a one-dimensional manifold  $S = \{(0, a, a) \mid a \geq 0\}$ . Since the ground truth is  $f^*(x) = 0$ , models with a smaller value of  $a$  generalizes better. For the global minima, we have

$$H_1 = \begin{pmatrix} 1 & 0 & 0 \\ 0 & 0 & 0 \\ 0 & 0 & 0 \end{pmatrix} \quad H_2 = \begin{pmatrix} 1 \\ \frac{1}{2\sqrt{a}} \\ -\frac{1}{2\sqrt{a}} \end{pmatrix} \begin{pmatrix} 1 & \frac{1}{2\sqrt{a}} & -\frac{1}{2\sqrt{a}} \end{pmatrix}^T.$$

The positive eigenvalues of the two matrices are 1 and  $1 + \frac{1}{2a}$ , respectively. When  $a$  is very small, they are very different from each other, i.e. the non-uniformity is large. They are close for large values of  $a$ . According to our analysis, SGD favors the area where  $H_2 \approx H_1$ . This means that SGD prefers solutions with larger values of  $a$  than GD.

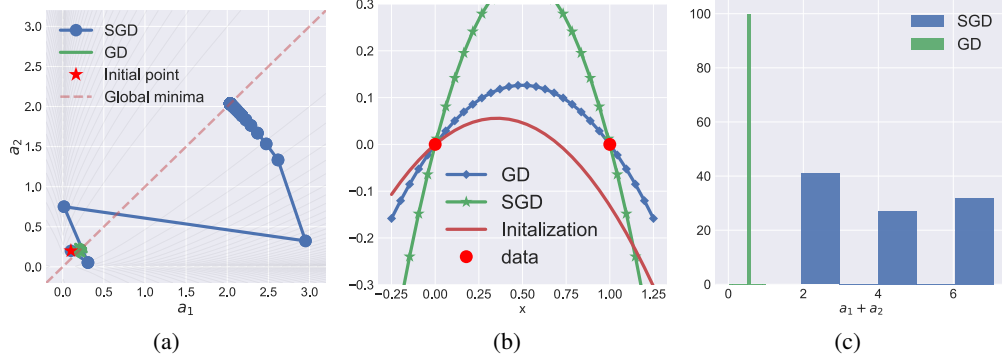

Figure 10: Fitting two points  $\{(0, 0), (1, 0)\}$  with a second order polynomial. Both SGD and GD are initialized from  $(a_0, a_1, a_2) = (0, 0.1, 0.2)$  with learning rate  $\eta = 0.5$ . **(a)** The trajectories of GD and SGD. **(b)** The solutions found by GD and SGD. **(c)** The histogram of  $a_1 + a_2$  of the solutions found by GD and SGD, by running the optimizers 100 times.

We run both GD and SGD starting from  $(0, 0.1, 0.2)$  with learning rate 0.5 for 500 steps. Figure 10 shows the results. In Figure 10a, we show the trajectory of GD and a realization of SGD. As we can see, SGD is unstable in the area near the initialization. It suddenly jumps to another area where  $a$  is larger, and converges gradually to a minimum with large  $a$ . In contrast, GD is stable in the initialization area. It converges to a minimum close to the starting point (small  $a$ ) without any jump. Since SGD has randomness, we ran this experiment for 100 times, and report the histogram of  $a_1 + a_2 = 2a$  of the converges results in Figure 10c. It clearly shows that with high probability SGD picks up solutions farther from the ground truth than GD.

## C Details of Experiments

### Model Architecture

- **FNN** A 4-layer fully connected network, which is used to fit FashionMNIST. The architecture is  $784 - 500 - 500 - 500 - 10$ .
- **VGG** A VGG-style network with 8 convolutional layers, which is used to fit CIFAR-10. The architecture is given in Table 4.
- **ResNet** A standard residual network with 14-layer convolutional layers. This network is used to fit CIFAR-10.

**Computation of the sharpness and non-uniformity** In this paper, the largest eigenvalues of both the Hessian matrix and the variance matrix are calculated by the power iteration, which is given as follows

$$\begin{aligned} v^k &\leftarrow v^k / \|v^k\| \\ v_{k+1} &= Av_k \\ \lambda_{k+1} &= v_{k+1}^T v_k \end{aligned}$$

Table 4: VGG network for CIFAR-10.

| Layer                         | Output size              |
|-------------------------------|--------------------------|
| input                         | $32 \times 32 \times 3$  |
| $3 \times 3 \times 16$ , conv | $32 \times 32 \times 16$ |
| $2 \times 2$ , maxpool        | $16 \times 16 \times 16$ |
| $3 \times 3 \times 16$ , conv | $16 \times 16 \times 16$ |
| $2 \times 2$ , maxpool        | $8 \times 8 \times 16$   |
| $3 \times 3 \times$ , conv    | $8 \times 8 \times 32$   |
| $2 \times 2$ , maxpool        | $4 \times 4 \times 32$   |
| $3 \times 3 \times 64$ , conv | $4 \times 4 \times 64$   |
| $2 \times 2$ , maxpool        | $2 \times 2 \times 64$   |
| $3 \times 3 \times 64$ , conv | $2 \times 2 \times 64$   |
| $2 \times 2$ , maxpool        | $1 \times 1 \times 64$   |
| $64 \rightarrow 128$ , linear | 128                      |
| $128 \rightarrow 2$ , linear  | 2                        |

where  $v_0$  is sampled from  $\mathcal{N}(0, I)$ . In the experiments, we found that power iteration always converge within tens of iterations.

The matrix vector product  $Av_k$  is computed by using the auto-differential functionality provided by PyTorch. For the Hessian matrix

$$H(x)v = \nabla(v^T \nabla f(x)).$$

For the covariance matrix  $\Sigma = \frac{1}{n} \sum_i H_i^2 - H^2$ ,  $H_i^2 v$  can be computed by

$$\begin{aligned} w &= \nabla(v^T \nabla f_i) \\ H_i^2 v &= \nabla(w^T \nabla f_i). \end{aligned}$$

The above operation needs to construct a new computation graph for each sample, so the computation of non-uniformity is very expensive.
